# Supplementary material for: Trans-omics biomarker model improves prognostic prediction accuracy for early-stage lung adenocarcinoma
Source: publisher site journal article supplement (doi:10.18632/aging.102189), 2019-08-21
Supplement: Supplementary file [file aging-v11i16-102189-supplementary-material-SD2.pdf]

## SUPPLEMENTARY FIGURES

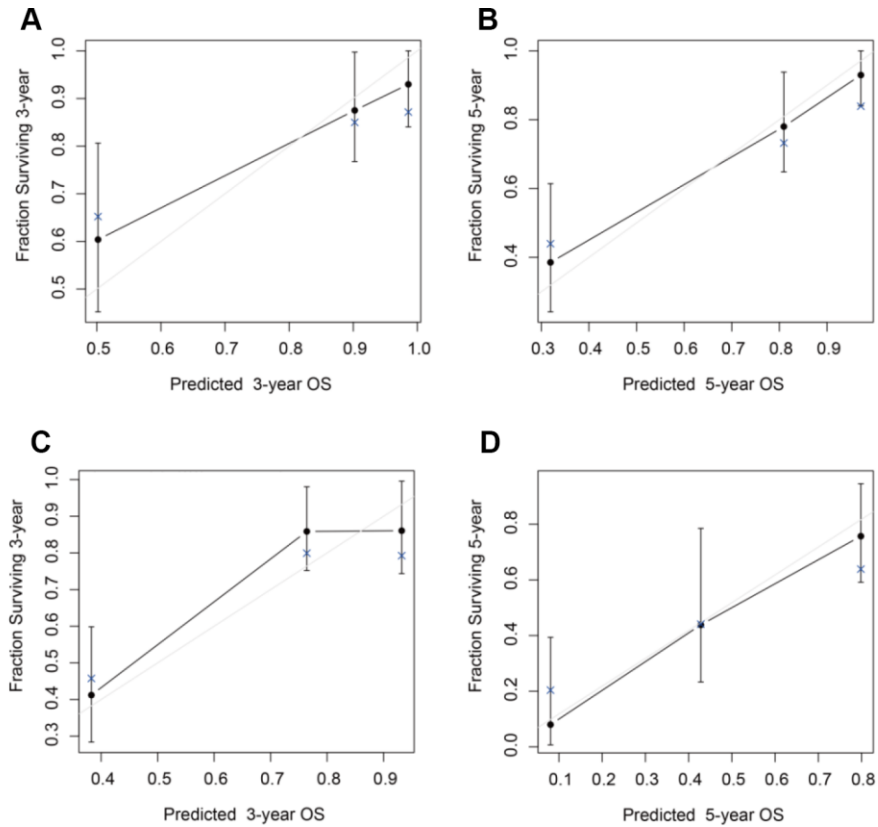

**Supplementary Figure 1. Nomogram model calibration curves:** (A) 3-year calibration curve in the discovery phase; (B) 5-year calibration curve in the discovery phase; (C) 3-year calibration curve in the validation phase; and (D) 5-year calibration curve in the validation phase. The x-axis shows nomogram-predicted probability of survival, and the y-axis shows actual survival as estimated by Kaplan-Meier. Gray line represents a perfect estimated outcome in an ideal model and perfect association with the actual outcome. Black line represents estimated outcome of the model, and closer alignment with the gray line represents better performance.

Pubmed was queried for the keywords “((Early stage) OR (Stage I) OR (Stage II)) AND (Lung Adenocarcinoma) AND (Prognosis) AND ((Prediction) OR (AUC) OR (c-index)) ” through 31 Mar 2019

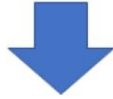

A total of 110 publications retrieved

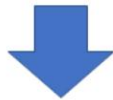

Excluded based on screening titles and abstracts and excluding articles with irrelevant objectives or animal studies (N=104)

Potentially relevant articles (N=6)

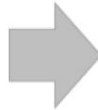

Systematic review (N=0)

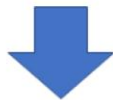

Articles included in out systematic review (N=6)

Supplementary Figure 2. Flowchart of systematic review.

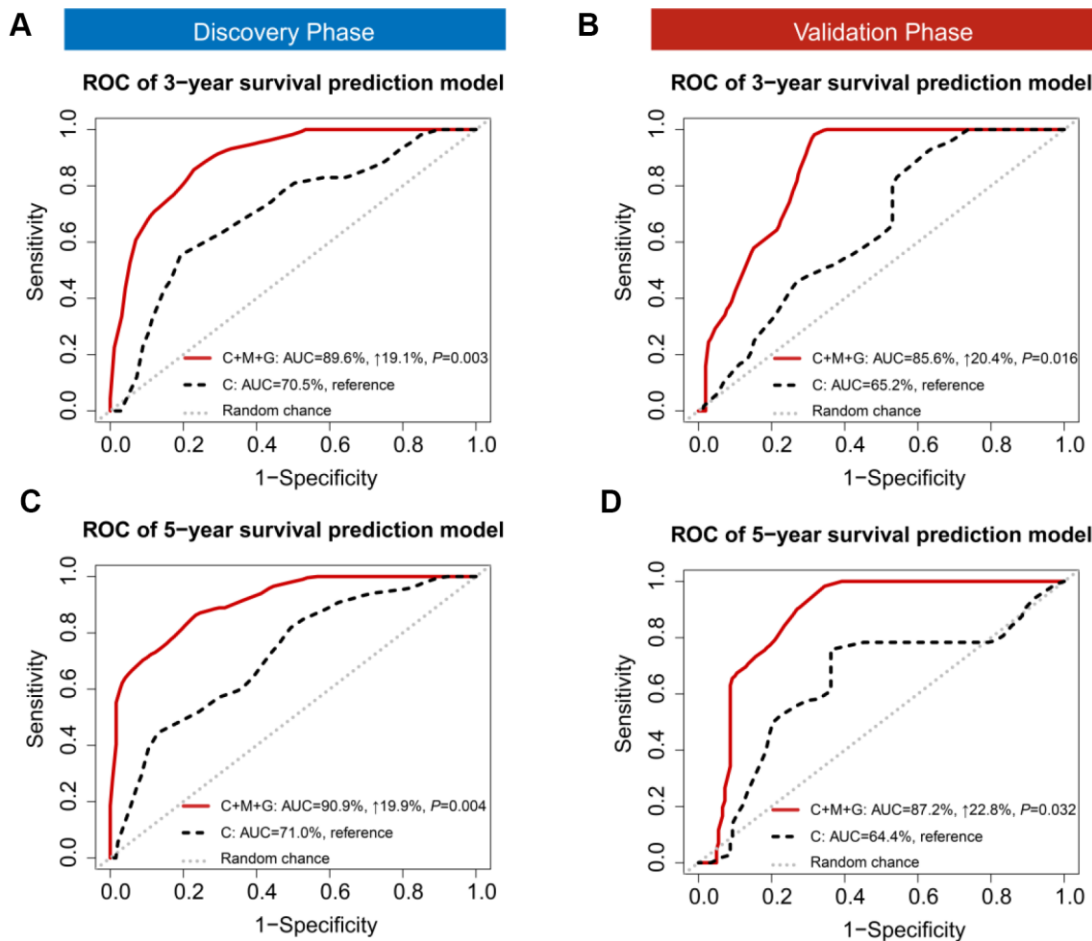

**Supplementary Figure 3. The ROC curves of the prognostic model with chemotherapy information in sensitivity analysis.** Time-dependent receiver operating characteristic (ROC). ROC was used to evaluate the performance of prognostic models for 3-year (A) and 5-year (B) overall survival prediction in the discovery phase. ROC also was used to evaluate the performance of prognostic models for 3-year (C) and 5-year (D) overall survival prediction in the validation phase. C: clinical model; C+M+G: clinical, DNA methylation, and gene expression model.

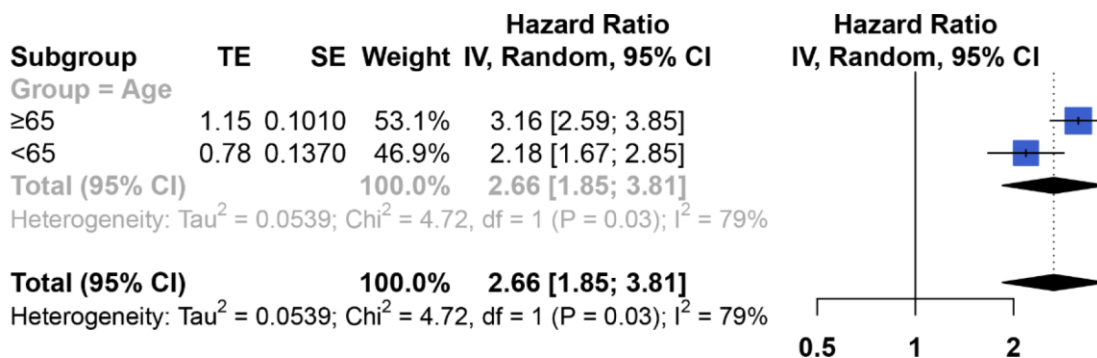

**Supplementary Figure 4. Hazard ratio of trans-omics biomarker risk score in elderly and young groups.**

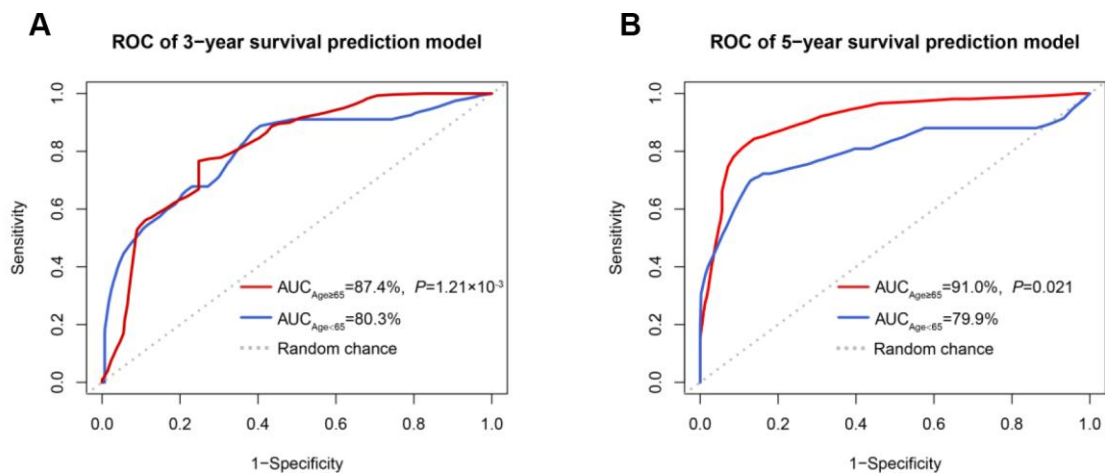

**Supplementary Figure 5. Time-dependent ROC curves in elderly and young groups.** ROC curve was used to evaluate the performance of prognostic models for 3-year (A) and 5-year (B) overall survival prediction.
